# Supplementary material
Source: PubMed Central journal article supplement (PMC1853193)
Supplement: bmj_334_7598_842__1.pdf [file bmj_334_7598_842__1.pdf]

**[posted as supplied by author]**

**Web references**

w1. Rothchild JM, Bates DW, Leape LL, Preventable medical injuries in older patients. *Arch Intern Med* 2000; 160: 2717-2728.

w2. Marcantonio ER, Flacker J, Michaels M, Resnick N. Delirium is independently associated with poor functional recovery after hip fracture. *J Am Geriatr Soc* 2000; 48: 618-624.

w3. Sasajima Y, Sasajima T, Uchida H, Kawai S, Haga M, et al. Postoperative delirium in patients with chronic lower limb ischaemia. *Europ J Vasc Endovasc Surg.* 2000; 20: 132-137

w4. Inouye SK. The dilemma of delirium: Clinical and research controversies regarding diagnosis and evaluation of delirium in hospitalised elderly medical patients. *Am J Med* 1994; 97: 278-288.

w5. Schofield I, An exploratory study of the reaction of older people to an episode of delirium. *J Adv Nursing* 1997; 25: 942-952.

w6. Cole M, McCusker J, Dendukuri N, Han L. The prospective significance of subsyndromal delirium in elderly medical inpatients. *J Am Geriatr Soc* 2003; 51: 754-760.

w7. Rockwood K, Cosway S, Stolee P, Kydd D, Carver D, Jarret P, O'Brien B. Increasing the recognition of delirium in elderly patients. *J Am Geriatr Soc* 1994; 42: 252-256.

w8. Schuurman MJ, Duursma SA, Shortridge-Baggett LM. Early recognition of delirium: a review of the literature. *J. Clin Nurs* 2001; 10: 721-729.

w9. Kakuma R, Galbaud du Fort G, Arsenault et al. Delirium in older emergency department patients discharged home: effects on survival. *J Am Geriatr Soc* 2003; 57: 443-450.

w10. Molloy DW, Standish TM. A guide to the standardised mini-mental state examination. *Int Psychogeriatr* 1997; 9: 87-94.

w11. Hodkinson HM. Evaluation of a mental test score for assessment of mental impairment in the elderly. *Age Ageing* 1972 1: 233-238.

w12. Brooke P, Bullock R. Validation of a 6 item cognitive impairment test with a view to primary care usage. *Intern J Psychiatry* 1999; 14: 936-940.

w13. Swain DG, O'Brien, Nightingale PG. Cognitive assessment in elderly patients admitted to hospital: the relationship between the shortened version of the AMT and the AMT and MMSE. *Clinical Rehabil* 2000; 14: 608-610.

w14. Trzepacz PT, Mittal D, Torres R, Kanary K, Norton J, Jimerson N. Validation of the Delirium Rating Scale-revised-98: comparison with the delirium rating scale and the cognitive test for delirium. [J Neuropsychiatry Clin Neurosci](#). 2001; 13: 229-42.

w15. Adamis D, Treloar A, Macdonald AJD, Martin FB. Concurrent validity of two instruments (the Confusion Assessment Method and the Delirium Rating Scale) in the detection of delirium among older medical inpatients. *Age Ageing* 2005; 34: 72-83.

w16. Inouye SK, Ferrucci L. Introduction: elucidating the pathophysiology of delirium and the inter-relationship of delirium and dementia. *J Geront A Biol Sci Med Sci*. 2006; 61: 1277-1280.

w17. Trzepacz P, van der Mast R. The neuropathology of delirium. In: Lindsay J, Rockwood K, Macdonald A, eds. *Delirium in Old Age*. Oxford, England: Oxford University Press, 2002: 51-90.

w18. White S. The neuropathogenesis of delirium. *Rev Clin Geront* 2002; 12: 62-67.

w19. Flacker JM, Lipsitz LA. Neural mechanisms of delirium: current hypotheses and evolving concepts. *J Geront A Biol Sci Med Sci* 1999; 54: 239-246

w20. White S, Calver BL, Newsway V, Wade R, Patel S, Bayer A, O'Mahoney S. Enzymes of drug metabolism during delirium. *Age Ageing* 2005; 34: 603-608.

w21. Elie M, Cole MG, Primeau FJ, Bellavance F. Delirium risk factors in elderly hospitalised patients. *J Gen Intern Med* 1998; 13: 204-212.

w22. Dasgupta M, Dumbrell Ac. Preoperative risk assessment for delirium after noncardiac surgery: a systematic review. *J Am Geriatr Soc*. 2006; 54: 1578-89.

w23. Bruce AJ, Ritchie CW, Blizard R, Lai R, Raven P. The incidence of delirium associated with orthopaedic surgery: a meta-analytic review. *Inter Psychogeriatr* 2006; 1-18.

w24. Freter SH, George J, Dunbar MG, Morrison M, MacKnight C, Rockwood K. Prediction of delirium in fractured neck of femur as part of routine preoperative nursing care. *Age Ageing* 2005; 34: 387-409.

w25. O’Keeffe ST, Lavan JN. Predicting delirium in elderly patients: development and validation of a risk stratification model. *Age Ageing* 1996; 25: 317-321.

w26. Kalisvaart KJ, Vreeswijk R, deJonghe JF, van der Ploeg T, vanGool WA, Eikelenboom P. Risk factors and prediction of postoperative delirium in elderly hip-surgery patients: implementation and validation of a medical risk factor model. *J Am Geriatr Soc.* 2006; 54: 8178-22.

w27. Lundström M, Edlund A, Lundström G, Gustafson Y. Reorganization of nursing and medical care to reduce the incidence of postoperative delirium and improve rehabilitation outcome in elderly patients treated for femoral neck fractures. *Scand J Caring Sci*1998; 13: 193-200.

w28. Milsen K, Foreman M, Abraham IL, DeGeest S, Gooderis J et al. A nurse-led interdisciplinary intervention programme for delirium in elderly hip fracture patients. *J Am Geriatr Soc.* 2001; 49: 523-532.

w29. Tabet N, Hudson S, Sweeny V, Sauer J, Bryant C, Macdonald A, Howard R. An educational intervention can prevent delirium on medical wards. *Age Ageing* 2005; 34: 152-156.

w30. Naughton BJ, Saltzman S, Ramadan F, Chadha N, Priore R, Mylotte JM. A multifactorial intervention to reduce prevalence of delirium and shorten hospital length of stay. *J Am Geriatr Soc.* 2005; 53: 18-23.

w31. Lundström M, Edlund A, Karlsson S, Brannstrom B, Bucht G, Gustafson Y. A multifactorial intervention program reduces the duration of delirium, length of hospitalization, and mortality in delirious patients. *J Am Geriatr Soc.* 2005; 53: 622-628.

w32. Young L J, George J. Do guidelines improve the process and outcomes of care in delirium? *Age Ageing.* 2003; 32: 525-528.

w33. Inouye SK, Baker DI, Fugal P, Bradley EH. Dissemination of the Hospital Elder Life Program: implementation, adaptation, and successes. *J Am Geriatr Soc* 2006; 54: 1492-1499.

w34. Cole MG, Primeau FJ, Bailey RF, Bonnycastle MJ, Masciarelli F, Engelsmann, Pepin MJ, Ducic D. Systematic intervention for elderly inpatients with delirium: a randomized trial. *Can Med Assoc J* 1994; 151: 965-970.

w35. Pitkala KH, Laurila TE, Strandberg TE, Tilvis RS. Multicomponent geriatric intervention for elderly inpatients with delirium: a randomised, controlled trial. *J Geront A Biol Sci Med Sci.* 2006; 61: 176-181.

w36. Flaherty JH, Tariq SH, Raghavan S, Bakshi S, Moinuddin A, Morley JE. A model for managing delirious older inpatients. *J Am Geriatr Soc.* 2003; 51:1031-5.

w37. O'Keeffe St. Down with bedrails? *Lancet* 2004; 363-364.

w38. Lacasse H, Perreault MM, Williamson DR. Systematic review of antipsychotics for the treatment of hospital-associated delirium in medically or surgically ill patients. *Ann Pharmacother* 2006; 40:1966-1973.

w39. Wooltorton E. Risperidone (Risperdal): increased rate of cerebrovascular events in dementia trials. *CMAJ* 2002;167: 1269-70. 10.

w40. Wooltorton E. Olanzapine (Zyprexa): increased incidence of cerebrovascular events in dementia trials. *CMAJ* 2004; 170: 1395.

W41. Leentjens AFG; Diefenbacher A. A survey of delirium guidelines in Europe. *Journal of Psychosomatic Research* 2006; 61: 123-128.
